# Supplementary material for: Altered expressions of CXCR4 and CD26 on T-helper lymphocytes in hereditary hemorrhagic telangiectasia
Source: Springer Nature journal article supplement (doi:10.1186/s13023-021-02139-y), 2021-12-14

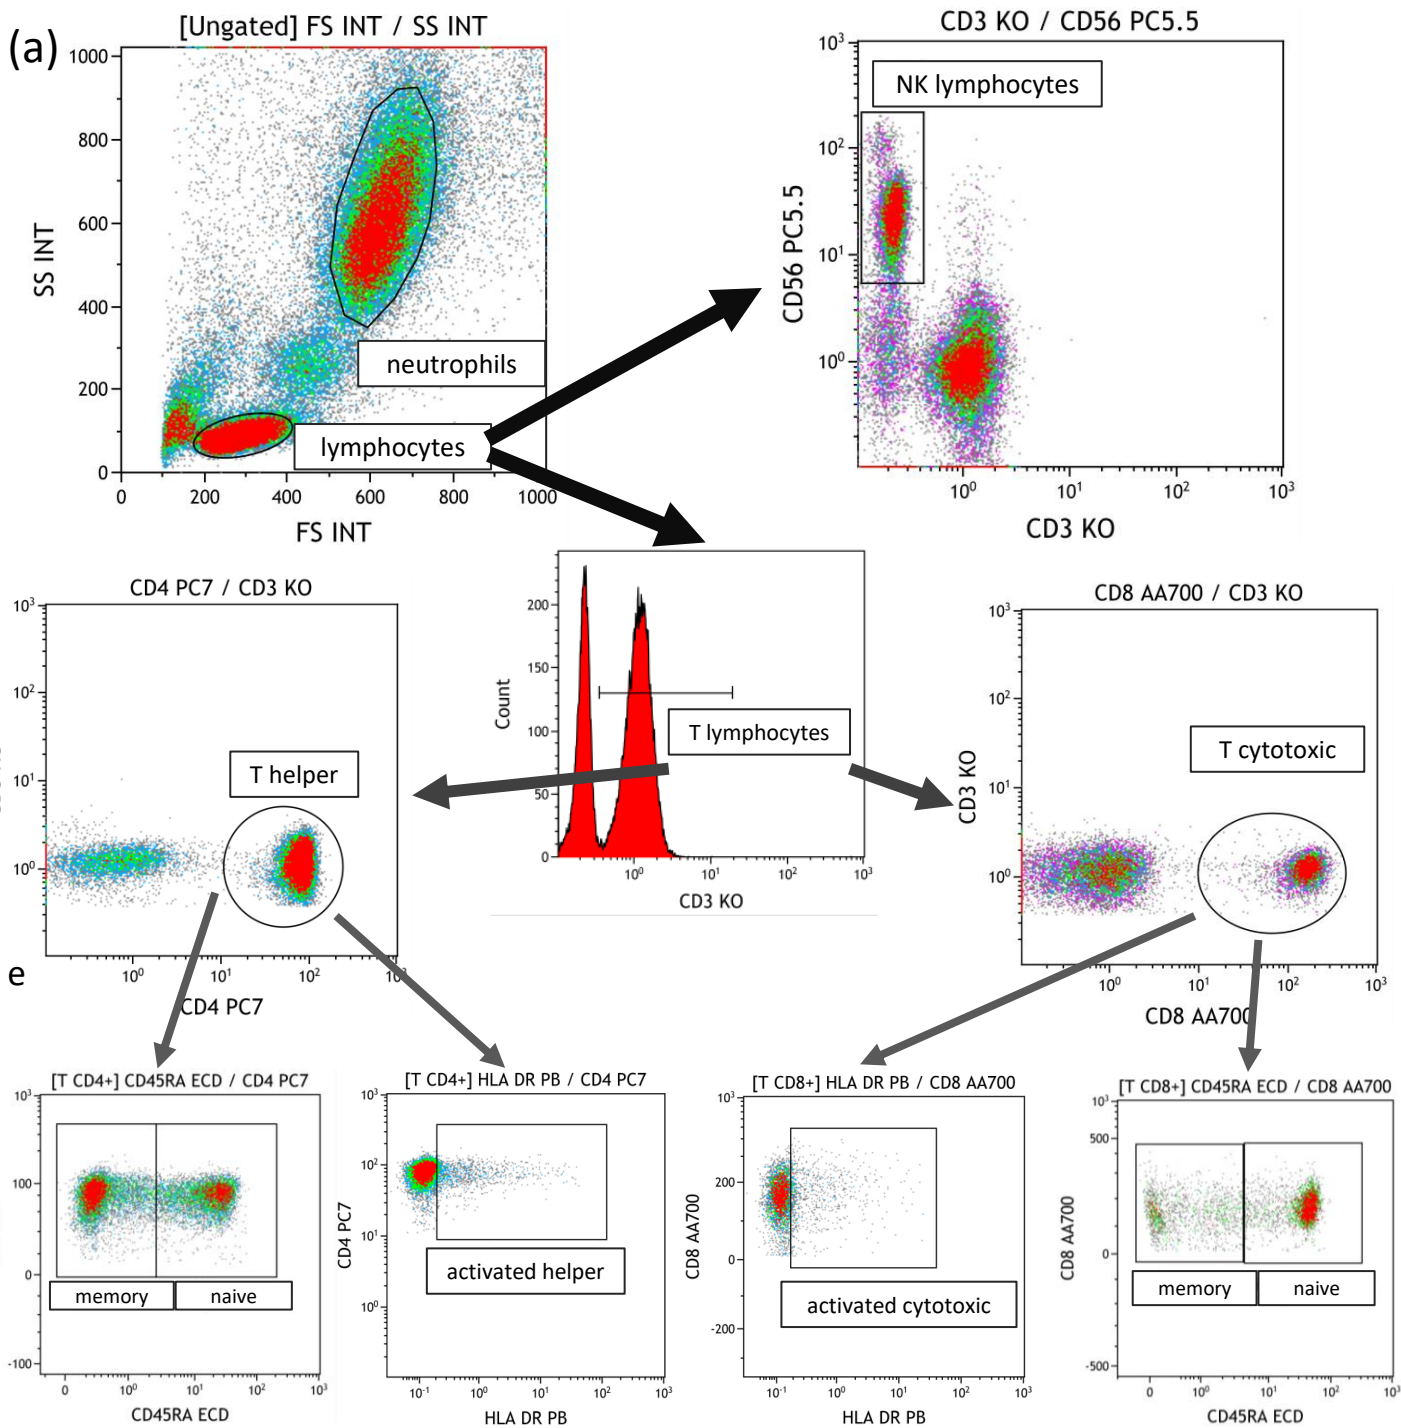

**(b)**

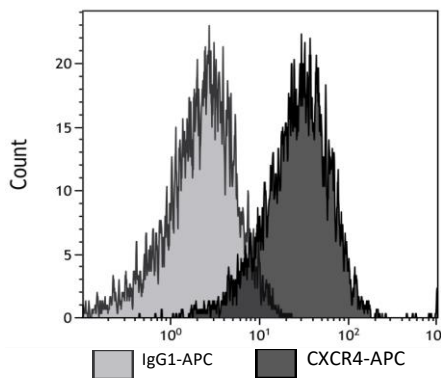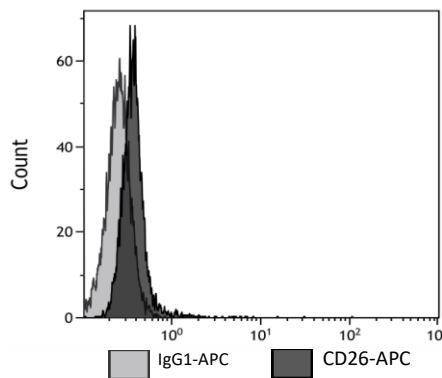

Supplement: MOESM2 [file 19958756]
